# Supplementary material
Source: PubMed Central journal article supplement (PMC4151059)
Supplement: Supp_Figure1.pdf [file Supp_Figure1.pdf]

## Supplementary Data

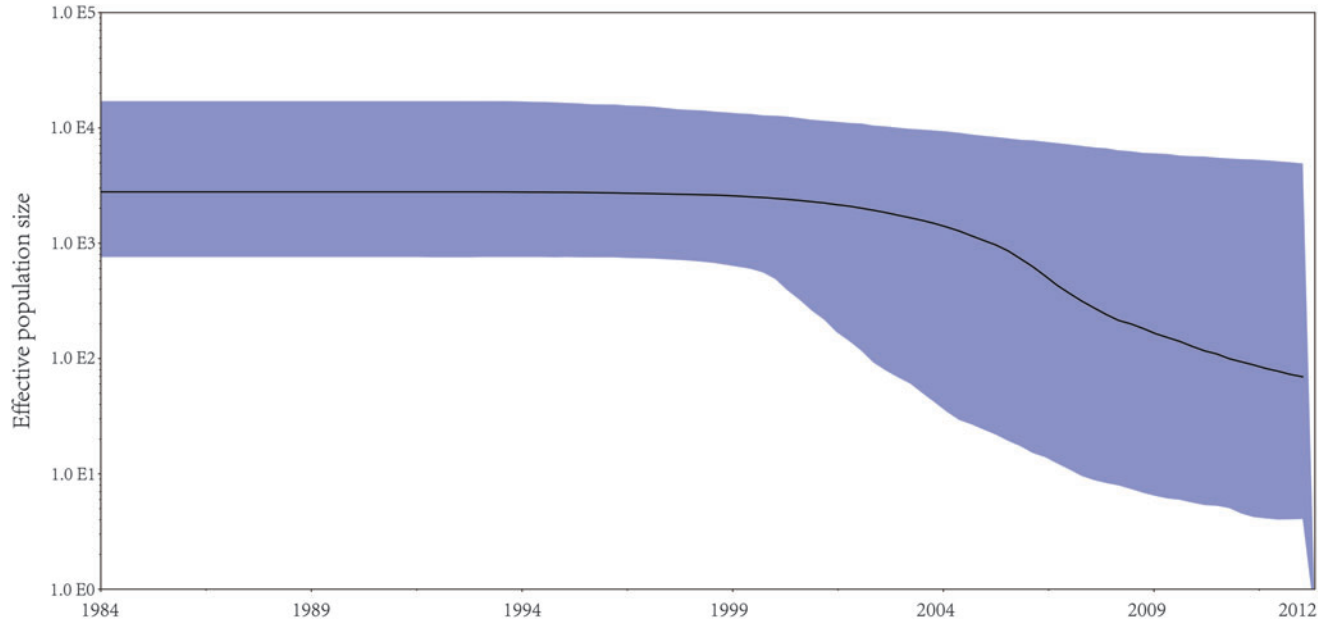

**SUPPLEMENTARY FIG. S1.** Demographic history of the expansion of HIV-1 subtype B' lineages in China. Bayesian skyline plot was estimated to reconstruct the demographic history of subtype B' in China using BEAST 1.4. The *x*-axis is the time in units of years and the *y*-axis is equal to the effective population size. The *thick solid line* is the mean estimates and the 95% HPD credible region is shown by *blue* areas.
