# Supplementary material
Source: PubMed Central journal article supplement (PMC4151059)
Supplement: Supp_Figure2.pdf [file Supp_Figure2.pdf]

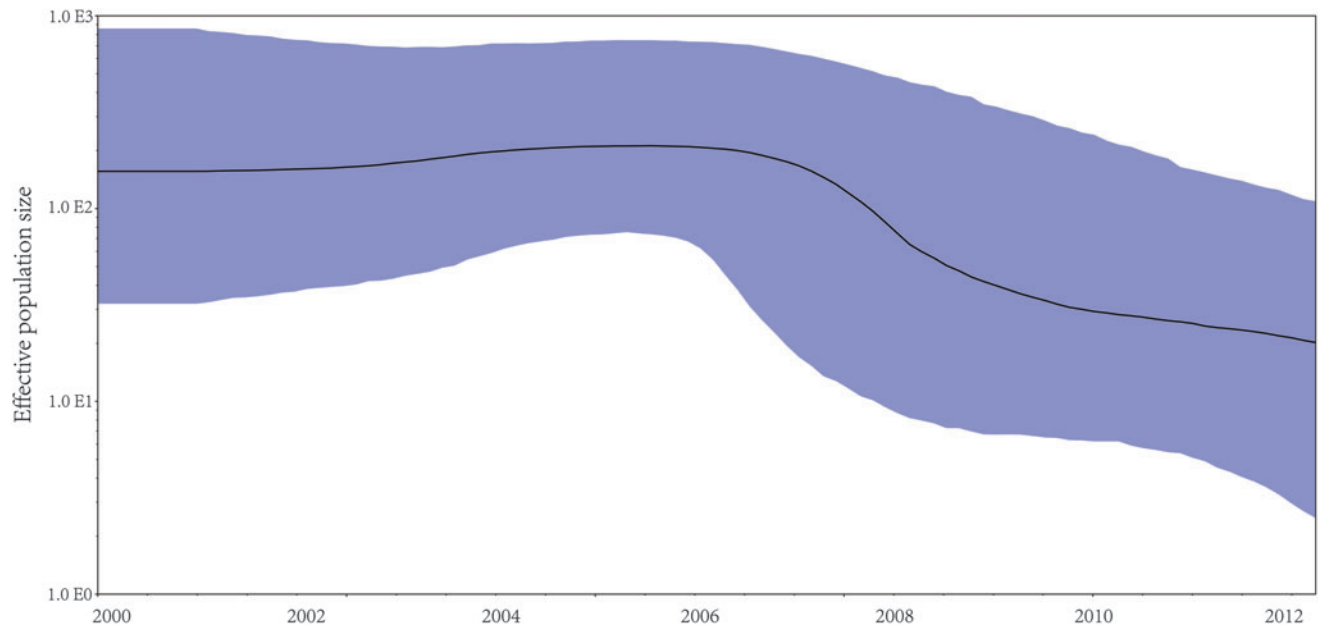

**SUPPLEMENTARY FIG. S2.** Demographic history of the expansion of HIV-1 subtype BJ-B lineages in China. Bayesian skyline plot was estimated to reconstruct the demographic history of subtype BJ-B in China using BEAST 1.4. The  $x$ -axis is the time in units of years and the  $y$ -axis is equal to the effective population size. The *thick solid line* is the mean estimates and the 95% HPD credible region is shown by *blue* areas.
